# Supplementary material for: Thermal annealing of colloidal monolayer at the air/water interface: a facile approach to transferrable colloidal masks with tunable interstice size for nanosphere lithography
Source: Royal Society of Chemistry journal article supplement (doi:10.1039/c2jm33660j), 2012-01-01
Supplement: c2jm33660j.pdf [file c2jm33660j.pdf]

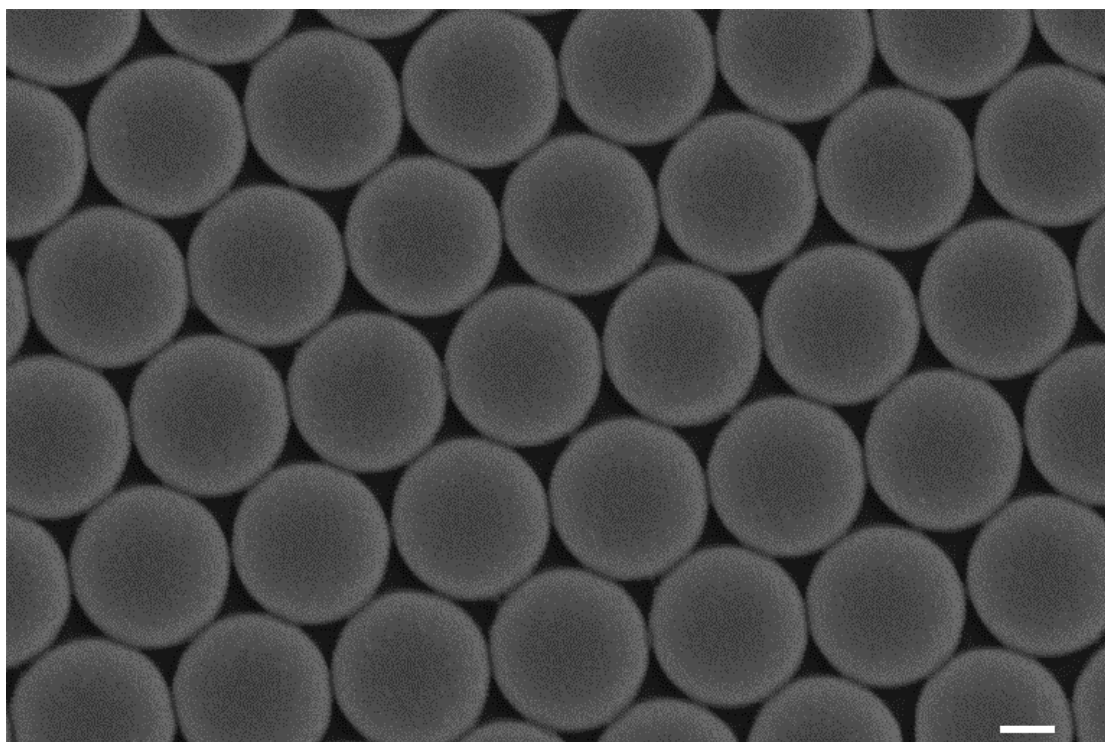

**Fig. S1** PS colloidal monolayer without thermal annealing. The scale bar is 200 nm.

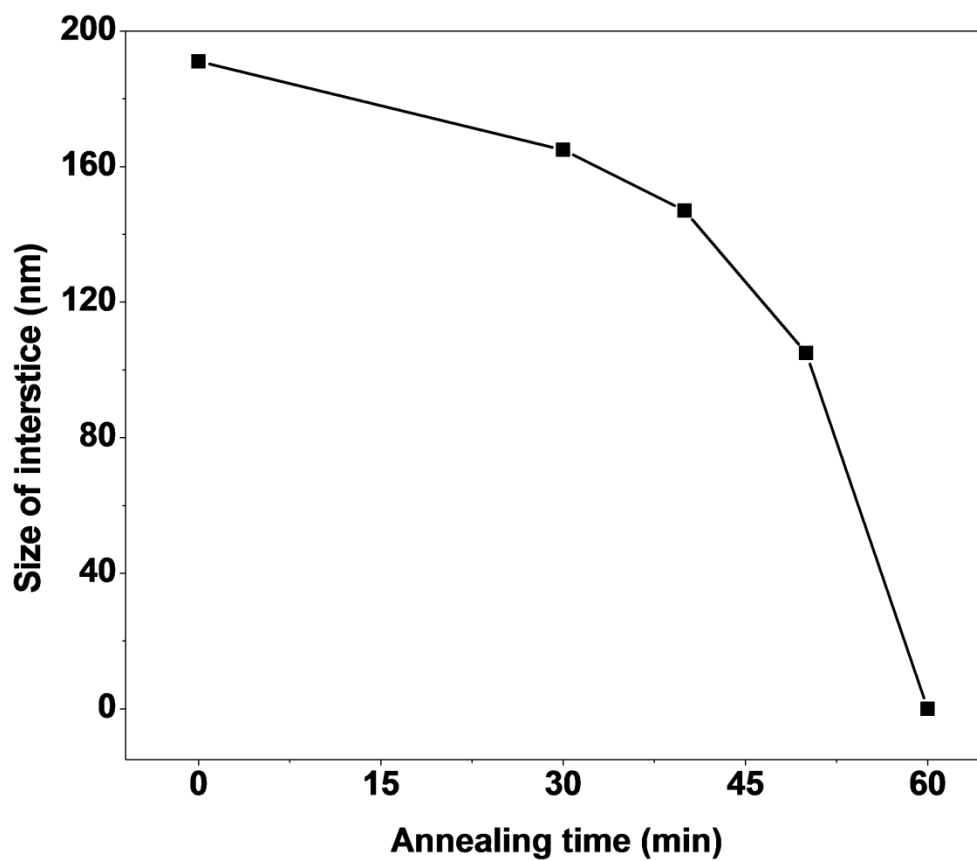

**Fig. S2** The interstice size as a function of the annealing time at 150°C.

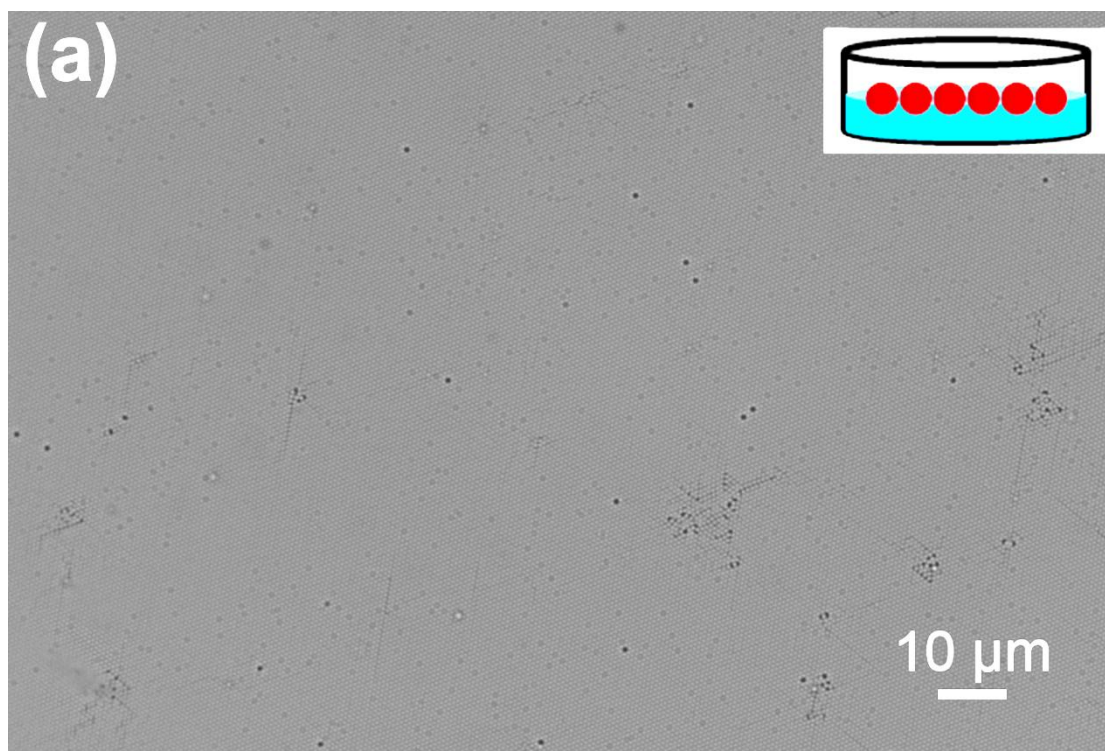

Sample A: A 683 nm PS colloidal monolayer floating on the water surface.

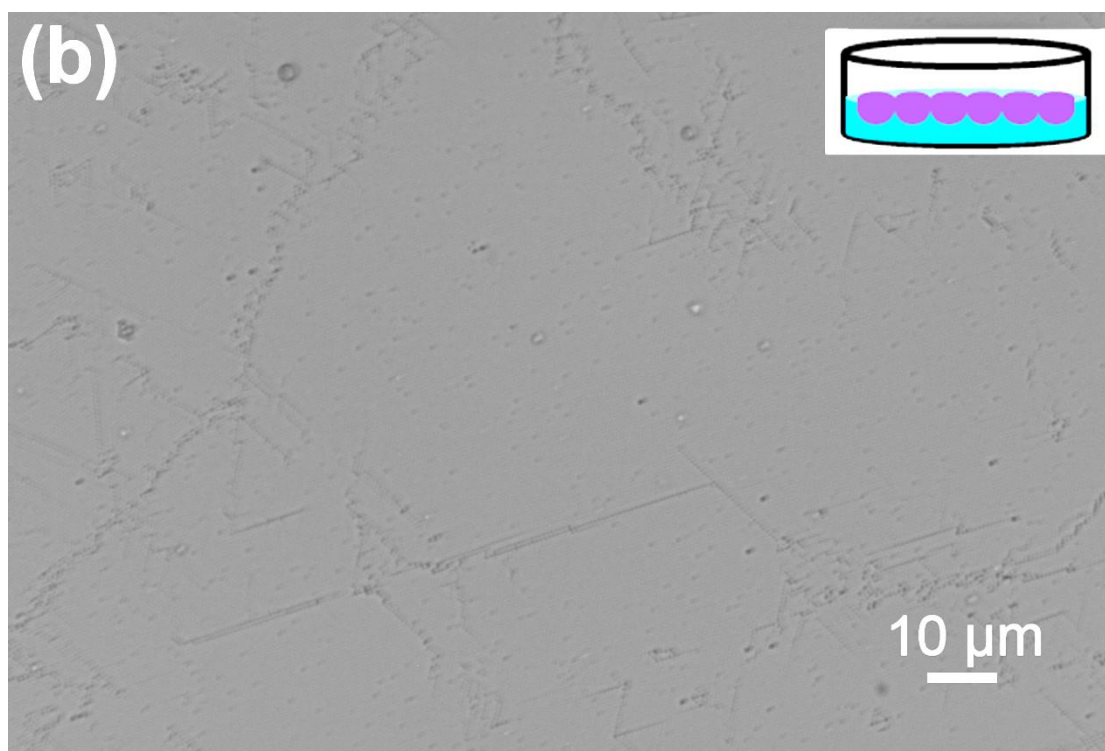

Sample B: A 683 nm PS colloidal monolayer floating on the water surface after thermal annealing.

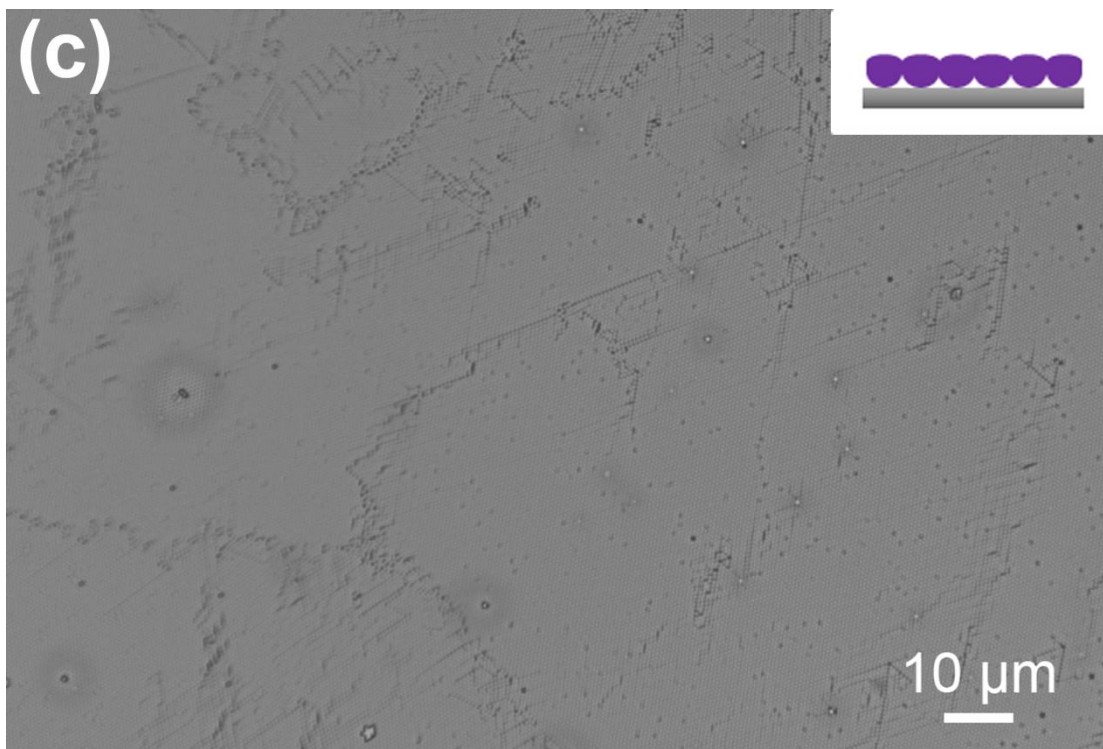

Sample C: A dry 683 nm PS colloidal monolayer on a glass substrate obtained by thermal annealing on the water surface and subsequently transferring to a glass substrate and drying.

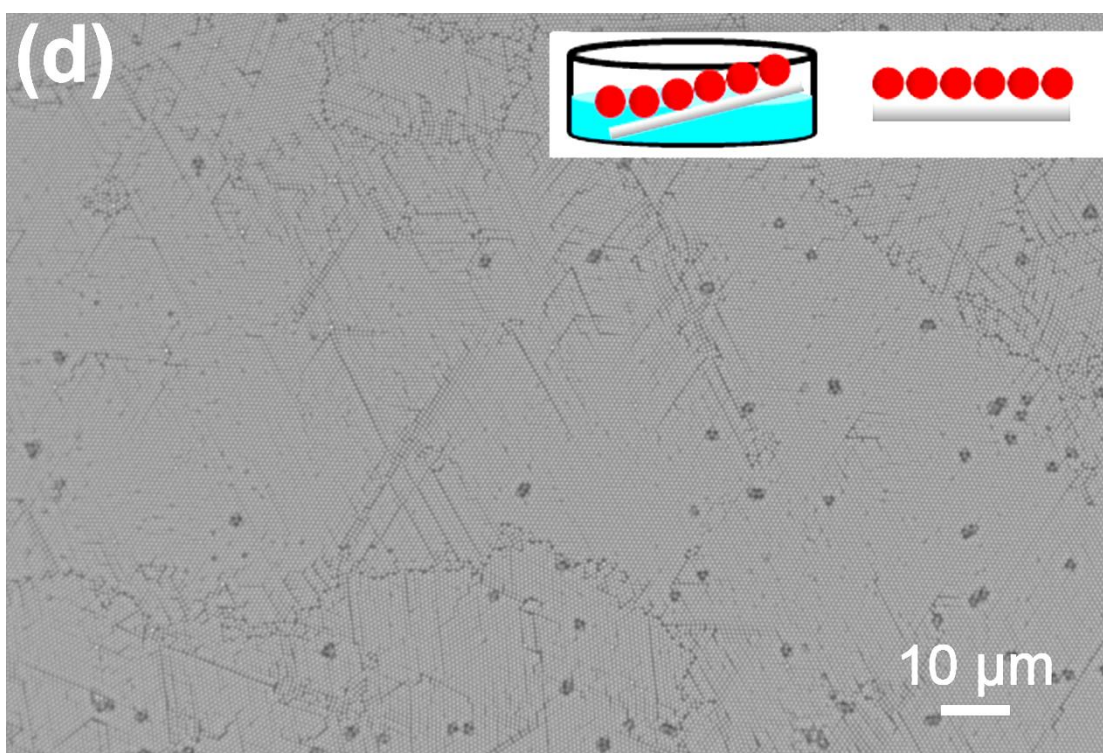

Sample D: A dry 683 nm PS colloidal monolayer on a glass substrate obtained by transferring a floating colloidal monolayer free of thermal annealing to a glass substrate and subsequently drying.

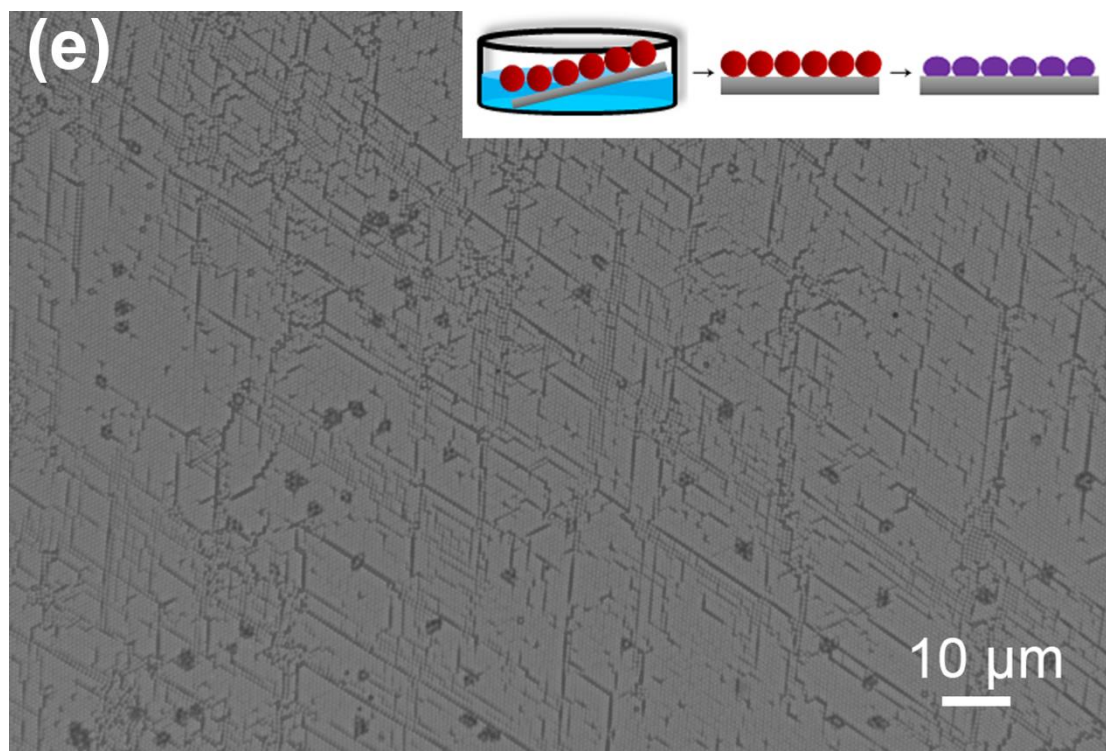

Sample E: A dry 658 nm PS colloidal monolayer on a glass substrate obtained by transferring a floating colloidal monolayer to a glass substrate and followed by drying and subsequently thermal annealing.

**Fig. S3.** Optical microphotographs of five different PS colloidal monolayers. Samples A and B are on water surface. Samples C, D and E are dry colloidal monolayer on glass substrates.

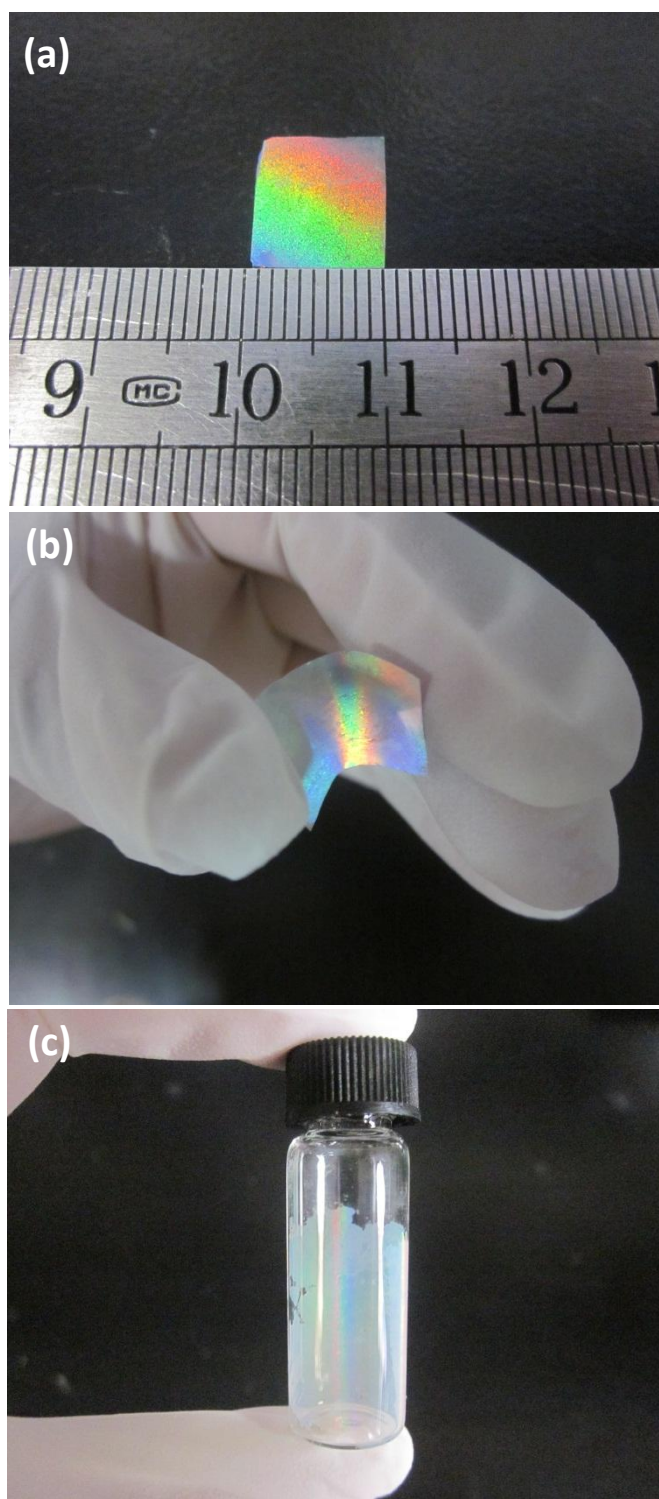

**Fig. S4** An annealed PS colloidal monolayer was transferred to (a)  $1 \times 1 \text{ cm}^2$  silicon wafer, (b)  $2 \times 1.5 \text{ cm}^2$  tinfoil and (c) curved solid substrates.
